# Supplementary material
Source: ML conference proceedings conference paper supplement (https://proceedings.neurips.cc/paper_files/paper/2019/hash/b0ba5c44aaf65f6ca34cf116e6d82ebf-Abstract.html)

---

# Correlation Clustering with Adaptive Similarity Queries (Supplementary Material)

---

## 1 Probability bounds

We give Chernoff-type probability bounds that can be found in e.g. [2] and that we repeatedly use in our proofs. Let  $X_1, \dots, X_n$  be binary random variables. We say that  $X_1, \dots, X_n$  are non-positively correlated if for all  $I \subseteq \{1, \dots, n\}$  we have:

$$\mathbb{P}[\forall i \in I : X_i = 0] \leq \prod_{i \in I} \mathbb{P}[X_i = 0] \quad \text{and} \quad \mathbb{P}[\forall i \in I : X_i = 1] \leq \prod_{i \in I} \mathbb{P}[X_i = 1] \quad (1)$$

The following holds:

**Lemma 1.** *Let  $X_1, \dots, X_n$  be independent or, more generally, non-positively correlated binary random variables. Let  $a_1, \dots, a_n \in [0, 1]$  and  $X = \sum_{i=1}^n a_i X_i$ . Then, for any  $\delta > 0$ , we have:*

$$\mathbb{P}[X < (1 - \delta)\mathbb{E}[X]] < e^{-\frac{\delta^2}{2}\mathbb{E}[X]} \quad (2)$$

$$\mathbb{P}[X > (1 + \delta)\mathbb{E}[X]] < e^{-\frac{\delta^2}{2+\delta}\mathbb{E}[X]} \quad (3)$$

## 2 Supplementary Material for Section 3

### 2.1 Pseudocode of ACC

For ease of reference we report the pseudocode of ACC below.

---

**Algorithm 1** ACC with query rate  $f$

---

**Parameters:** residual node set  $V_r$ , round index  $r$

- 1: **if**  $|V_r| = 0$  **then** RETURN
  - 2: **if**  $|V_r| = 1$  **then** output singleton cluster  $V_r$  and RETURN
  - 3: **if**  $r > \lceil f(|V_1| - 1) \rceil$  **then** RETURN
  - 4: Draw pivot  $\pi_r$  u.a.r. from  $V_r$
  - 5:  $C_r \leftarrow \{\pi_r\}$  ▷ Create new cluster and add the pivot to it
  - 6: Draw a random subset  $S_r$  of  $\lceil f(|V_r| - 1) \rceil$  nodes from  $V_r \setminus \{\pi_r\}$
  - 7: **for** each  $u \in S_r$  **do** query  $\sigma(\pi_r, u)$
  - 8: **if**  $\exists u \in S_r$  such that  $\sigma(\pi_r, u) = +1$  **then** ▷ Check if there is at least a positive edge
  - 9:     Query all remaining pairs  $(\pi_r, u)$  for  $u \in V_r \setminus (\{\pi_r\} \cup S_r)$
  - 10:     $C_r \leftarrow C_r \cup \{u : \sigma(\pi_r, u) = +1\}$  ▷ Populate cluster based on queries
  - 11: Output cluster  $C_r$
  - 12:  $\text{ACC}(V_r \setminus C_r, r + 1)$  ▷ Recursive call on the remaining nodes
-

## 2.2 Proof of Theorem 1

We refer to the pseudocode above (Algorithm 1). We use  $V_r$  to denote the set of remaining nodes at the beginning of the  $r$ -th recursive call, and we let  $n_r = |V_r| - 1$ . Hence  $V_1 = V$  and  $n_1 = n - 1$ . If the condition in the **if** statement on line 8 is not true, then  $C_r$  is a singleton cluster. We denote by  $V_{\text{sing}}$  the set nodes that are output as singleton clusters.

Let  $\Gamma_A$  be the set of mistaken edges for the clustering output by ACC and let  $\Delta_A = |\Gamma_A|$  be the cost of this clustering. Note that, in any recursive call, ACC misclassifies an edge  $e = \{u, w\}$  if and only if  $e$  is part of a bad triangle whose third node  $v$  is chosen as pivot and does not become a singleton cluster, or if  $\sigma(e) = +1$  and at least one of  $u, w$  becomes a singleton cluster. More formally, ACC misclassifies an edge  $e = \{u, w\}$  if and only if one of the following three disjoint events holds:

- $B_1(e)$ : There exists  $r \leq \lceil f(n-1) \rceil$  and a bad triangle  $T \equiv \{u, v, w\} \subseteq V_r$  such that  $\pi_r = v$  and  $v \notin V_{\text{sing}}$ .
- $B_2(e)$ : There exists  $r \leq \lceil f(n-1) \rceil$  such that  $u, w \in V_r$  with  $\sigma(u, w) = +1$  and  $\pi_r \in \{u, w\} \cap V_{\text{sing}}$ .
- $B_3(e)$ : ACC stops after  $\lceil f(n-1) \rceil$  rounds without removing neither  $u$  nor  $w$ , and  $\sigma(u, w) = +1$ .

Therefore the indicator variable for the event “ $e$  is mistaken” is:

$$\mathbb{I}\{e \in \Gamma_A\} = \mathbb{I}\{B_1(e)\} + \mathbb{I}\{B_2(e)\} + \mathbb{I}\{B_3(e)\}$$

The expected cost of the clustering is therefore:

$$\mathbb{E}[\Delta_A] = \sum_{e \in \mathcal{E}} \mathbb{P}(B_1(e)) + \sum_{e \in \mathcal{E}} \mathbb{P}(B_2(e)) + \sum_{e \in \mathcal{E}} \mathbb{P}(B_3(e)) \quad (4)$$

We proceed to bound the three terms separately.

**Bounding  $\sum_{e \in \mathcal{E}} \mathbb{P}(B_1(e))$ .** Fix an arbitrary edge  $e = \{u, w\}$ . Note that, if  $B_1(e)$  occurs, then  $T$  is unique, i.e. exactly one bad triangle  $T$  in  $V$  satisfies the definition of  $B_1(e)$ . Each occurrence of  $B_1(e)$  can thus be charged to a single bad triangle  $T$ . We may thus write

$$\begin{aligned} \sum_{e \in \mathcal{E}} \mathbb{I}\{B_1(e)\} &= \sum_{e \in \mathcal{E}} \mathbb{I}\{(\exists r)(\exists T \in \mathcal{T}) : T \subseteq V_r \wedge e \subset T \wedge \pi_r \in T \setminus e \wedge \pi_r \notin V_{\text{sing}}\} \\ &= \sum_{T \in \mathcal{T}} \mathbb{I}\{(\exists r) : T \subseteq V_r \wedge \pi_r \in T \wedge \pi_r \notin V_{\text{sing}}\} \\ &\leq \sum_{T \in \mathcal{T}} \mathbb{I}\{A_T\} \end{aligned}$$

where  $A_T \equiv \{(\exists r) : T \subseteq V_r \wedge \pi_r \in T\}$ . Let us then bound  $\sum_{T \in \mathcal{T}} \mathbb{P}(A_T)$ . Let  $\mathcal{T}(e) \equiv \{T' \in \mathcal{T} : e \in T'\}$ . We use the following fact extracted from the proof of [1, Theorem 6.1]. If  $\{\beta_T \geq 0 : T \in \mathcal{T}\}$  is a set of weights on the bad triangles such that  $\sum_{T \in \mathcal{T}(e)} \beta_T \leq 1$  for all  $e \in \mathcal{E}$ , then  $\sum_{T \in \mathcal{T}} \beta_T \leq \text{OPT}$ . Given  $e \in \mathcal{E}$  and  $T \in \mathcal{T}$ , let  $F_T(e)$  be the event corresponding to  $T$  being the first triangle in the set  $\mathcal{T}(e)$  such that  $T \in V_r$  and  $\pi_r \in T \setminus e$  for some  $r$ . Now if  $F_T(e)$  holds then  $A_T$  holds and no other  $A_{T'}$  for  $T' \in \mathcal{T}(e) \setminus \{T\}$  holds. Therefore

$$\sum_{T \in \mathcal{T}(e)} \mathbb{I}\{A_T \wedge F_T(e)\} = 1.$$

If  $A_T$  holds for some  $r_0$ , then it cannot hold for any other  $r > r_0$  because  $\pi_{r_0} \in T$  implies that for all  $r > r_0$  we have  $\pi_{r_0} \notin V_r$  implying  $T \not\subseteq V_r$ . Hence, given that  $A_T$  holds for  $r_0$ , if  $F_T(e)$  holds too, then it holds for the same  $r_0$  by construction. This implies that  $\mathbb{P}(F_T(e) \mid A_T) = \frac{1}{3}$  because ACC chooses the pivot u.a.r. from the nodes in  $V_{r_0}$ . Thus, for each  $e \in \mathcal{E}$  we can write

$$1 = \sum_{T \in \mathcal{T}(e)} \mathbb{P}(A_T \wedge F_T(e)) = \sum_{T \in \mathcal{T}(e)} \mathbb{P}(F_T(e) \mid A_T) \mathbb{P}(A_T) = \sum_{T \in \mathcal{T}(e)} \frac{1}{3} \mathbb{P}(A_T). \quad (5)$$

Choosing  $\beta_T = \frac{1}{3} \mathbb{P}(A_T)$  we get  $\sum_{T \in \mathcal{T}} \mathbb{P}(A_T) \leq 3\text{OPT}$ .

In the proof of KwikCluster, the condition  $\sum_{T \in \mathcal{T}(e)} \beta_T \leq 1$  was ensured by considering events  $G_T(e) = A_T \wedge e \in \Gamma_A$ . Indeed, in KwikCluster the events  $\{G_T(e) : T \in \mathcal{T}(e)\}$  are disjoint,

because  $G_T(e)$  holds iff  $T$  is the first and only triangle in  $\mathcal{T}(e)$  whose node opposite to  $e$  is chosen as pivot. For ACC this is not true because a pivot can become a singleton cluster, which does not cause  $e \in \Gamma_A$  necessarily to hold.

**Bounding  $\sum_{e \in \mathcal{E}} \mathbb{P}(B_2(e))$ .** For any  $u \in V_r$ , let  $d_r^+(u) = |\{v \in V_r : \sigma(u, v) = +1\}|$ . We have:

$$\sum_{e \in \mathcal{E}} \mathbb{I}\{B_2(e)\} = \frac{1}{2} \sum_{u \in V} \sum_{r=1}^{\lceil f(n-1) \rceil} \mathbb{I}\{\pi_r = u \wedge \pi_r \in V_{\text{sing}}\} d_r^+(u).$$

Taking expectations with respect to the randomization of ACC,

$$\begin{aligned} \sum_{e \in \mathcal{E}} \mathbb{P}(B_2(e)) &= \frac{1}{2} \sum_{u \in V} \sum_{r=1}^{\lceil f(n-1) \rceil} \mathbb{E} \left[ \mathbb{I}\{\pi_r = u \wedge \pi_r \in V_{\text{sing}}\} d_r^+(u) \right] \\ &= \frac{1}{2} \sum_{u \in V} \sum_{r=1}^{\lceil f(n-1) \rceil} \mathbb{E} \left[ \mathbb{I}\{\pi_r \in V_{\text{sing}}\} d_r^+(u) \mid \pi_r = u \right] \mathbb{P}(\pi_r = u) \end{aligned}$$

For any round  $r$ , let  $H_{r-1}$  be the sequence of random draws made by the algorithm before round  $r$ . Then  $\mathbb{P}(\pi_r \in V_{\text{sing}} \mid \pi_r = u, H_{r-1}) d_r^+(u) = 0$  if either  $d_r^+(u) = 0$ , or  $d_r^+(u) \geq 1$  and  $d_r^-(u) < \lceil f(n_r) \rceil$ . Otherwise,

$$\mathbb{P}(\pi_r \in V_{\text{sing}} \mid \pi_r = u, H_{r-1}) = \prod_{j=0}^{\lceil f(n_r) \rceil - 1} \frac{d_r^-(u) - j}{n_r - j} \leq \left( \frac{d_r^-(u)}{n_r} \right)^{\lceil f(n_r) \rceil} = \left( 1 - \frac{d_r^+(u)}{n_r} \right)^{\lceil f(n_r) \rceil} \quad (6)$$

where the inequality holds because  $d_r^-(u) \leq n_r$ . Therefore, when  $d_r^+(u) \geq 1$  and  $d_r^-(u) \geq \lceil f(n_r) \rceil$ ,

$$\begin{aligned} \mathbb{E} \left[ \mathbb{I}\{\pi_r \in V_{\text{sing}}\} d_r^+(u) \mid \pi_r = u, H_{r-1} \right] &= \mathbb{P}(\pi_r \in V_{\text{sing}} \mid \pi_r = u, H_{r-1}) d_r^+(u) \\ &= \left( 1 - \frac{d_r^+(u)}{n_r} \right)^{\lceil f(n_r) \rceil} d_r^+(u) \\ &= \left( 1 - \frac{d_r^+(u)}{n_r} \right)^{\lceil f(n_r) \rceil} d_r^+(u) \\ &\leq \exp \left( - \frac{d_r^+(u) \lceil f(n_r) \rceil}{n_r} \right) d_r^+(u) \\ &\leq \max_{z > 0} \exp \left( - \frac{z \lceil f(n_r) \rceil}{n_r} \right) z \\ &\leq \frac{n_r}{e \lceil f(n_r) \rceil} \\ &\leq \frac{n_r}{e f(n_r)}. \end{aligned}$$

Combining with the above, this implies

$$\sum_{e \in \mathcal{E}} \mathbb{P}(B_2(e)) \leq \frac{1}{2e} \sum_{r=1}^{\lceil f(n-1) \rceil} \mathbb{E} \left[ \frac{n_r}{f(n_r)} \right] \leq \frac{1}{2e} \sum_{r=1}^{\lceil f(n-1) \rceil} \frac{n}{f(n)} \leq \frac{n}{e}$$

where we used the facts that  $n_r \leq n$  and the properties of  $f$ .

**Bounding  $\sum_{e \in \mathcal{E}} \mathbb{P}(B_3(e))$ .** Let  $V_{\text{fin}}$  be the remaining vertices in  $V_r$  after the algorithm stops and assume  $|V_{\text{fin}}| > 1$  (so that there is at least a query left). Let  $n_{\text{fin}} = |V_{\text{fin}}| - 1$  and, for any  $u \in V_{\text{fin}}$ , let  $d_{\text{fin}}^+(u) = |\{v \in V_{\text{fin}} : \sigma(u, v) = +1\}|$ . In what follows, we conventionally assume  $V_r \equiv V_{\text{fin}}$  for any  $r > \lceil f(n-1) \rceil$ , and similarly for  $n_{\text{fin}}$  and  $d_{\text{fin}}^+$ . We have

$$\sum_{e \in \mathcal{E}} \mathbb{I}\{B_3(e)\} = \frac{1}{2} \sum_{u \in V_{\text{fin}}} d_{\text{fin}}^+(u) \leq \frac{1}{2} \left( \sum_{u \in V_{\text{fin}}} \frac{n_{\text{fin}}}{\lceil f(n_{\text{fin}}) \rceil} + \sum_{u \in V_{\text{fin}}} \mathbb{I} \left\{ d_{\text{fin}}^+(u) > \frac{n_{\text{fin}}}{\lceil f(n_{\text{fin}}) \rceil} \right\} d_{\text{fin}}^+(u) \right).$$

Fix some  $r \leq \lceil f(n-1) \rceil$ . Given any vertex  $v \in V_r$  with  $d_r^+(v) \geq \frac{n_r}{\lceil f(n_r) \rceil}$ , let  $E_r(v)$  be the event that, at round  $r$ , ACC queries  $\sigma(v, u)$  for all  $u \in V_r \setminus \{v\}$ . Introduce the notation  $S_r = \sum_{u \in V_r} \mathbb{I} \left\{ d_r^+(u) > \frac{n_r}{\lceil f(n_r) \rceil} \right\} d_r^+(u)$  with  $S_r = S_{\text{fin}}$  for all  $r > \lceil f(n) \rceil$ , and let  $\delta_r = n_r - n_{r+1}$  be the number of nodes that are removed from  $V_r$  at the end of the  $r$ -th recursive call. Then

$$\delta_r \geq \mathbb{I} \{E_r(\pi_r)\} d_r^+(\pi_r) \geq \mathbb{I} \left\{ d_r^+(\pi_r) > \frac{n_r}{\lceil f(n_r) \rceil} \right\} \mathbb{I} \{E_r(\pi_r)\} d_r^+(\pi_r)$$

and

$$\mathbb{E}[\delta_r \mid H_{r-1}] \geq \sum_{v \in V_r} \mathbb{I} \left\{ d_r^+(v) > \frac{n_r}{\lceil f(n_r) \rceil} \right\} \mathbb{P}(E_r(v) \mid \pi_r = v, H_{r-1}) \mathbb{P}(\pi_r = v \mid H_{r-1}) d_r^+(v).$$

Using the same argument as the one we used to bound (6),

$$\mathbb{P}(E_r(v) \mid \pi_r = v, H_{r-1}) \geq 1 - \left(1 - \frac{d_r^+(v)}{n_r}\right)^{\lceil f(n_r) \rceil} \geq 1 - \left(1 - \frac{1}{\lceil f(n_r) \rceil}\right)^{\lceil f(n_r) \rceil} \geq 1 - \frac{1}{e}$$

and  $\mathbb{P}(\pi_r = v \mid H_{r-1}) = \frac{1}{n_r+1}$  for any  $v \in V_r$ , we may write

$$\mathbb{E}[\delta_r \mid H_{r-1}] \geq \left(1 - \frac{1}{e}\right) \frac{\mathbb{E}[S_r \mid H_{r-1}]}{n_r + 1} \geq \left(1 - \frac{1}{e}\right) \frac{\mathbb{E}[S_r \mid H_{r-1}]}{n}.$$

Observe now that  $\sum_{r=1}^{\lceil f(n-1) \rceil} \delta_r \leq n_1 - n_{\text{fin}} \leq n - 1$  and  $S_r$  is monotonically nonincreasing in  $r$ . Thus

$$n - 1 \geq \sum_{r=1}^{\lceil f(n-1) \rceil} \mathbb{E}[\delta_r] \geq \frac{1}{n} \left(1 - \frac{1}{e}\right) \sum_{r=1}^{\lceil f(n) \rceil} \mathbb{E}[S_r] \geq \frac{\lceil f(n-1) \rceil}{n} \left(1 - \frac{1}{e}\right) \mathbb{E}[S_{\text{fin}}]$$

which implies  $\mathbb{E}[S_{\text{fin}}] \leq \left(\frac{e}{e-1}\right) \frac{n(n-1)}{\lceil f(n-1) \rceil} \leq \left(\frac{e}{e-1}\right) \frac{n(n-1)}{f(n-1)}$ . By the properties of  $f$ , however,  $\left(\frac{e}{e-1}\right) \frac{n(n-1)}{f(n-1)} \leq \left(\frac{e}{e-1}\right) \frac{n^2}{f(n)}$ . So we have

$$\sum_{e \in \mathcal{E}} \mathbb{P}(B_3(e)) \leq \frac{1}{2} \left( \sum_{u \in V_{\text{fin}}} \mathbb{E} \left[ \frac{n_{\text{fin}}}{f(n_{\text{fin}})} \right] + \mathbb{E}[S_{\text{fin}}] \right) \leq \frac{1}{2} \left( \frac{n^2}{f(n)} + \frac{e}{e-1} \frac{n^2}{f(n)} \right)$$

as claimed.

**Bounding the number of queries.** In any given round, ACC asks less than  $n$  queries. Since the number of rounds is at most  $\lceil f(n) \rceil$ , the overall number of queries is less than  $n \lceil f(n) \rceil$ .

**KwikCluster as special case.** One can immediately see that, if  $f(n) = n$  for all  $n$ , then ACC coincides with KwikCluster and therefore the bound  $\mathbb{E}[\Delta] \leq 3\text{OPT}$  applies [1].

## 2.3 Pseudocode of ACCESS

## 2.4 Proof of Theorem 2

We refer to the pseudocode of ACCESS (Algorithm 2).

**Bounding  $\mathbb{E}[\Delta_A]$ .** Let  $G_r$  be the residual graph at round  $r$ . The total clustering cost  $\Delta_A$  of ACCESS can be bounded by the sum of two terms: the clustering cost  $\Delta_1$  of ACC without round restriction (i.e. ACC terminating only when the residual graph is empty), and the number of edges  $\Delta_2$  in the residual graph  $G_r$  if  $r$  is the round at which ACCESS stops. Concerning  $\Delta_1$ , the proof of Theorem 1 shows that  $\mathbb{E}[\Delta_1] \leq 3\text{OPT} + n/e$ . Concerning  $\Delta_2$ , we have two cases. If ACCESS stops at line 1, then obviously  $\Delta_2 \leq 2n^2/f(n)$ . If instead ACCESS stops at line 4, then note that for any  $k \geq 0$  the probability that such an event happens given that  $\Delta_2 = k$  is at most:

$$\left(1 - \frac{k}{\binom{|V_r|}{2}}\right)^{\lceil \binom{|V_r|}{2} f(n)/n^2 \rceil} \leq e^{-kf(n)/n^2}$$

Thus  $\mathbb{E}[\Delta_2] \leq \max_{k \geq 1} (ke^{-kf(n)/n^2}) \leq \frac{n^2}{ef(n)} < 2n^2/f(n)$ .

---

**Algorithm 2** ACCESS with query rate  $f$ 


---

**Parameters:** residual node set  $V_r$ , round index  $r$

- 1: **if**  $\binom{|V_r|}{2} \leq 2n^2/f(n)$  **then** STOP and declare every  $v \in V_r$  as singleton
  - 2: Sample the labels of  $\lceil \binom{|V_r|}{2} f(n)/n^2 \rceil$  pairs chosen u.a.r. from  $\binom{V_r}{2}$
  - 3: **if** no label is positive **then**
  - 4:     STOP and declare every  $v \in V_r$  as singleton
  - 5: Draw pivot  $\pi_r$  u.a.r. from  $V_r$
  - 6:  $C_r \leftarrow \{\pi_r\}$  ▷ Create new cluster and add the pivot to it
  - 7: Draw a random subset  $S_r$  of  $\lceil f(|V_r| - 1) \rceil$  nodes from  $V_r \setminus \{\pi_r\}$
  - 8: **for** each  $u \in S_r$  **do** query  $\sigma(\pi_r, u)$
  - 9: **if**  $\exists u \in S_r$  such that  $\sigma(\pi_r, u) = +1$  **then** ▷ Check if there is at least an edge
  - 10:     Query all remaining pairs  $(\pi_r, u)$  for  $u \in V_r \setminus (\{\pi_r\} \cup S_r)$
  - 11:      $C_r \leftarrow C_r \cup \{u : \sigma(\pi_r, u) = +1\}$  ▷ Populate cluster based on queries
  - 12: Output cluster  $C_r$
  - 13: ACCESS( $V_r \setminus C_r, r + 1$ ) ▷ Recursive call on the remaining nodes
- 

**Bounding  $\mathbb{E}[Q]$ .** The queries performed at line 1 are deterministically at most  $n \lceil f(n) \rceil$ . Concerning the other queries (line 8 and line 10), we divide the algorithm in two phases: the “heavy” rounds  $r$  where  $G_r$  still contains at least  $n^2/(2f(n))$  edges, and the remaining “light” rounds where  $G_r$  contains less than  $n^2/(2f(n))$  edges.

Consider first a “heavy” round  $r$ . We see  $G_r$  as an arbitrary fixed graph: for all random variables mentioned below, the distribution is thought solely as a function of the choices of the algorithm in the current round (i.e., the pivot node  $\pi_r$  and the queried edges). Now, let  $Q_r$  be the number of queries performed at lines 8 and 10, and  $R_r = |V_r| - |V_{r+1}|$  be the number of nodes removed. Let  $\pi_r$  be the pivot, and let  $D_r$  be its degree in  $G_r$ . Let  $X_r$  be the indicator random variable of the event that  $\sigma(\pi_r, u) = +1$  for some  $u \in S_r$ . Observe that:

$$Q_r \leq \lceil f(|V_r| - 1) \rceil + X_r(|V_r| - 1) \quad \text{and} \quad R_r = 1 + X_r D_r$$

Thus  $\mathbb{E}[Q_r] \leq \lceil f(|V_r| - 1) \rceil + \mathbb{E}[X_r|V_r|]$ , while  $\mathbb{E}[R_r] = 1 + \mathbb{E}[X_r D_r]$ . However,  $X_r$  is monotonically increasing in  $D_r$ , so  $\mathbb{E}[X_r D_r] = \mathbb{E}[X_r] \mathbb{E}[D_r] + \text{Cov}(X_r, D_r) \geq \mathbb{E}[X_r] \mathbb{E}[D_r]$ . Moreover, by hypothesis  $\mathbb{E}[D_r] \geq 2(n^2/(2f(n)))/|V_r| \geq n/f(n)$ . Thus:

$$\begin{aligned} \mathbb{E}[R_r] &\geq 1 + \mathbb{E}[X_r] \mathbb{E}[D_r] \\ &\geq 1 + \mathbb{E}[X_r] \frac{n}{f(n)} \\ &\geq 1 + \mathbb{E}[X_r] \frac{|V_r|}{f(|V_r|)} \\ &\geq 1 + \mathbb{E}[X_r] \frac{|V_r|}{\lceil f(|V_r|) \rceil} \\ &\geq \frac{\mathbb{E}[Q_r]}{\lceil f(|V_r|) \rceil} \\ &\geq \frac{\mathbb{E}[Q_r]}{\lceil f(n) \rceil} \end{aligned}$$

But then, since obviously  $\sum_r R_r \leq n$ :

$$\mathbb{E} \left[ \sum_{r \text{ heavy}} Q_r \right] \leq \lceil f(n) \rceil \mathbb{E} \left[ \sum_{r \text{ heavy}} R_r \right] \leq n \lceil f(n) \rceil$$

Consider now the “light” rounds, where  $G_r$  contains less than  $n^2/(2f(n))$  edges. In any such round the expected number of edges found at line 2 is less than:

$$\frac{n^2/f(n)}{2 \binom{|V_r|}{2}} \left\lceil \binom{|V_r|}{2} f(n)/n^2 \right\rceil \tag{7}$$

However,  $\binom{|V_r|}{2} > 2n^2/f(n)$  otherwise ACCESS would have stopped at line 1, hence:

$$\left\lceil \binom{|V_r|}{2} f(n)/n^2 \right\rceil \leq \frac{3}{2} \binom{|V_r|}{2} f(n)/n^2 \quad (8)$$

which implies that the expression in (7) is bounded by  $\frac{3}{4}$ . By Markov's inequality this is also an upper bound on the probability that ACCESS finds some edge at line 2, so in every light round ACCESS stops at line 4 with probability at least  $\frac{1}{4}$ . Hence ACCESS completes at most 4 light rounds in expectation; the corresponding expected number of queries is then at most  $4n$ .

## 2.5 Proof of Theorem 3

First of all, note that if the residual graph  $G_r$  contains  $\mathcal{O}(n^2/f(n))$  edges, from  $r$  onward ACCESS stops at each round independently with constant probability. The expected number of queries performed before stopping is therefore  $\mathcal{O}(n)$ , and the expected error incurred is obviously at most  $\mathcal{O}(n^2/f(n))$ .

We shall then bound the expected number of queries required before the residual graph contains  $\mathcal{O}(n^2/f(n))$  edges. In fact, by definition of  $i'$ , if ACCESS removes  $C_{i'}, \dots, C_\ell$ , then the residual graph contains  $\mathcal{O}(n^2/f(n))$  edges. We therefore bound the expected number of queries before  $C_{i'}, \dots, C_\ell$  are removed.

First of all recall that, when pivoting on a cluster of size  $c$ , the probability that the cluster is *not* removed is at most  $e^{-cf(n)/n}$ . Thus the probability that the cluster is not removed after  $\Omega(c)$  of its nodes have been used as pivot is  $e^{-\Omega(c^2)f(n)/n}$ . Hence the probability that *any* of  $C_{i'}, \dots, C_\ell$  is not removed after  $\Omega(c)$  of its nodes are used as pivot is, setting  $c = \Omega(h(n))$  and using a union bound, at most  $p = ne^{-\Omega(h(n)^2)f(n)/n}$ . Observe that  $h(n) = \Omega(n/f(n))$ , for otherwise  $\sum_{j=1}^{i'} \binom{C_j}{2} = o(n^2/f(n))$ , a contradiction. Therefore  $p \leq ne^{-\Omega(h(n))}$ . Note also that we can assume  $h(n) = \omega(\ln n)$ , else the theorem bound is trivially  $\mathcal{O}(n^2)$ . This gives  $p = \mathcal{O}(ne^{-\omega(\ln n)}) = o(1/\text{poly}(n))$ . We can thus condition on the events that, at any point along the algorithm, every cluster among  $C_{i'}, \dots, C_\ell$  that is still in the residual graph has size  $\Omega(h(n))$ ; the probability of any other event changes by an additive  $\mathcal{O}(p)$ , which can be ignored.

Let now  $k = \ell - i' + 1$ , and suppose at a generic point  $k' \leq k$  of the clusters  $C_{i'}, \dots, C_\ell$  are in the residual graph. Their total size is therefore  $\Omega(k'h(n))$ . Therefore  $\mathcal{O}(n/k'h(n))$  rounds in expectation are needed for the pivot to fall among those clusters. Each time this happens, with probability  $1 - e^{-\Omega(h(n))f(n)/n} = \Omega(1)$  the cluster containing the pivot is removed. Hence, in expectation a new cluster among  $C_{i'}, \dots, C_\ell$  is removed after  $\mathcal{O}(n/k'h(n))$  rounds. By summing over all values of  $k'$ , the number of expected rounds to remove all of  $C_{i'}, \dots, C_\ell$  is

$$\mathcal{O}\left(\sum_{k'=1}^k \frac{n}{k'h(n)}\right) = \mathcal{O}(n(\ln n)/h(n))$$

Since each round involves  $\mathcal{O}(n)$  queries, the bound follows.

## 3 Supplementary Material for Section 4

### 3.1 Proof of Theorem 4

Fix any  $C$  that is  $(1 - \varepsilon)$ -knit. We show that ACC outputs a  $\widehat{C}$  such that

$$\mathbb{E}[|\widehat{C} \cap C|] \geq \max \left\{ \left(1 - \frac{5}{2}\varepsilon\right) |C| - 2\frac{n}{f(n)}, \left(\frac{f(n)}{n} - \frac{5}{2}\varepsilon\right) |C| \right\} \text{ and } \mathbb{E}[|\widehat{C} \cap \overline{C}|] \leq \frac{\varepsilon}{2} |C| \quad (9)$$

One can check that these two conditions together imply the first two terms in the bound. We start by deriving a lower bound on  $\mathbb{E}[|\widehat{C} \cap C|]$  for KwikCluster assuming  $|E_C| = \binom{|C|}{2}$ . Along the way we introduce most of the technical machinery. We then port the bound to ACC, relax the assumption to  $|E_C| \geq (1 - \varepsilon) \binom{|C|}{2}$ , and bound  $\mathbb{E}[|\widehat{C} \cap \overline{C}|]$  from above. Finally, we add the  $|C|e^{-|C|f(n)/5n}$  part of the bound. To lighten the notation, from now on  $C$  denotes both the cluster and its cardinality  $|C|$ .

For the sake of analysis, we see KwikCluster as the following equivalent process. First, we draw a random permutation  $\pi$  of  $V$ . This is the ordered sequence of *candidate pivots*. Then, we set  $G_1 = G$ , and for each  $i = 1, \dots, n$  we proceed as follows. If  $\pi_i \in G_i$ , then  $\pi_i$  is used as an actual pivot; in this case we let  $G_{i+1} = G_i \setminus (\pi_i \cup \mathcal{N}_{\pi_i})$  where  $\mathcal{N}_v$  is the set of neighbors of  $v$ . If instead  $\pi_i \notin G_i$ , then we let  $G_{i+1} = G_i$ . Hence,  $G_i$  is the residual graph just before the  $i$ -th candidate pivot  $\pi_i$  is processed. We indicate the event  $\pi_i \in G_i$  by the random variable  $P_i$ :

$$P_i = \mathbb{I}\{\pi_i \in G_i\} = \mathbb{I}\{\pi_i \text{ is used as pivot}\} \quad (10)$$

More in general, we define a random variable indicating whether node  $v$  is “alive” in  $G_i$ :

$$X(v, i) = \mathbb{I}\{v \in G_i\} = \mathbb{I}\{v \notin \cup_{j < i: P_j=1} (\pi_j \cup \mathcal{N}_{\pi_j})\} \quad (11)$$

Let  $i_C = \min\{i : \pi_i \in C\}$  be the index of the first candidate pivot of  $C$ . Define the random variable:

$$S_C = |C \cap G_{i_C}| = \sum_{v \in C} X(v, i_C) \quad (12)$$

In words,  $S_C$  counts the nodes of  $C$  still alive in  $G_{i_C}$ . Now consider the following random variable:

$$S = P_{i_C} \cdot S_C \quad (13)$$

Let  $\hat{C}$  be the cluster that contains  $\pi_{i_C}$  in the output of KwikCluster. It is easy to see that  $|C \cap \hat{C}| \geq S$ . Indeed, if  $P_{i_C} = 1$  then  $\hat{C}$  includes  $C \cap G_{i_C}$ , so  $|C \cap \hat{C}| \geq P_{i_C} S_C = S$ . If instead  $P_{i_C} = 0$ , then  $S = 0$  and obviously  $|C \cap \hat{C}| \geq 0$ . Hence in any case  $|C \cap \hat{C}| \geq S$ , and  $\mathbb{E}[|C \cap \hat{C}|] \geq \mathbb{E}[S]$ . Therefore we can bound  $\mathbb{E}[|C \cap \hat{C}|]$  from below by bounding  $\mathbb{E}[S]$  from below.

Before continuing, we simplify the analysis by assuming KwikCluster runs on the graph  $G$  after all edges not incident on  $C$  have been deleted. We can easily show that this does not increase  $S$ . First, by (11) each  $X(v, i_C)$  is a nonincreasing function of  $\{P_i : i < i_C\}$ . Second, by (12) and (13),  $S$  is a nondecreasing function of  $\{X(v, i_C) : v \in C\}$ . Hence,  $S$  is a nonincreasing function of  $\{P_i : i < i_C\}$ . Now, the edge deletion forces  $P_i = 1$  for all  $i < i_C$ , since any  $\pi_i : i < i_C$  has no neighbor  $\pi_j : j < i$ . Thus the edge deletion does not increase  $S$  (and, obviously,  $\mathbb{E}[S]$ ). We can then assume  $G[V \setminus C]$  is an independent set. At this point, any node not adjacent to  $C$  is isolated and can be ignored. We can thus restrict the analysis to  $C$  and its neighborhood in  $G$ . Therefore we let  $\bar{C} = \{v : \{u, v\} \in E, u \in C, v \notin C\}$  denote both the neighborhood and the complement of  $C$ .

We turn to bounding  $\mathbb{E}[S]$ . For now we assume  $G[C]$  is a clique; we will then relax the assumption to  $|E_C| \geq (1 - \varepsilon) \binom{C}{2}$ . Since by hypothesis  $\text{cut}(C, \bar{C}) < \varepsilon C^2$ , the average degree of the nodes in  $\bar{C}$  is less than  $\varepsilon C^2 / \bar{C}$ . This is also a bound on the expected number of edges between  $C$  and a node drawn u.a.r. from  $\bar{C}$ . But, for any given  $i$ , conditioned on  $i_C - 1 = i$  the nodes  $\pi_1, \dots, \pi_{i_C-1}$  are indeed drawn u.a.r. from  $\bar{C}$ , and so have a total of at most  $i \varepsilon C^2 / \bar{C}$  edges towards  $C$  in expectation. Thus, over the distribution of  $\pi$ , the expected number of edges between  $C$  and  $\pi_1, \dots, \pi_{i_C-1}$  is at most:

$$\sum_{i=0}^n \frac{i \varepsilon C^2}{\bar{C}} \mathbb{P}(i_C - 1 = i) = \frac{\varepsilon C^2}{\bar{C}} \mathbb{E}[i_C - 1] = \frac{\varepsilon C^2}{\bar{C}} \frac{\bar{C}}{C+1} < \varepsilon C \quad (14)$$

where we used the fact that  $\mathbb{E}[i_C - 1] = \bar{C} / (C+1)$ . Now note that (14) is a bound on  $C - \mathbb{E}[S_C]$ , the expected number of nodes of  $C$  that are adjacent to  $\pi_1, \dots, \pi_{i_C-1}$ . Therefore,  $\mathbb{E}[S_C] \geq (1 - \varepsilon)C$ .

Recall that  $P_{i_C}$  indicates whether  $\pi_{i_C}$  is not adjacent to any of  $\pi_1, \dots, \pi_{i_C-1}$ . Since the distribution of  $\pi_{i_C}$  is uniform over  $C$ ,  $\mathbb{P}(P_{i_C} | S_C) = S_C / C$ . But  $S = P_{i_C} S_C$ , hence  $\mathbb{E}[S | S_C] = (S_C)^2 / C$ , and thus  $\mathbb{E}[S] = \mathbb{E}[(S_C)^2] / C$ . Using  $\mathbb{E}[S_C] \geq (1 - \varepsilon)C$  and invoking Jensen's inequality we obtain

$$\mathbb{E}[S] \geq \frac{\mathbb{E}[S_C]^2}{C} \geq (1 - \varepsilon)^2 C \geq (1 - 2\varepsilon)C \quad (15)$$

which is our bound on  $\mathbb{E}[|C \cap \hat{C}|]$  for KwikCluster.

Let us now move to ACC. We have to take into account the facts that ACC performs  $f(|G_r| - 1)$  queries on the pivot before deciding whether to perform  $|G_r| - 1$  queries, and that ACC stops after  $f(n - 1)$  rounds. We start by addressing the first issue, assuming for the moment ACC has no restriction on the number of rounds.

Recall that  $\mathbb{P}(P_{i_C} \mid S_C) = S_C/C$ . Now, if  $P_{i_C} = 1$ , then we have  $S_C - 1$  edges incident on  $\pi_{i_C}$ . It is easy to check that, if  $n_r + 1$  is the number of nodes at the round when  $\pi_{i_C}$  is used, then the probability that ACC finds some edge incident on  $\pi_{i_C}$  is at least:

$$1 - \left(1 - \frac{S_C - 1}{n_r}\right)^{\lceil f(n_r) \rceil} \geq 1 - e^{-f(n_r) \frac{S_C - 1}{n_r}} \geq 1 - e^{-f(n) \frac{S_C - 1}{n}} \quad (16)$$

and, if this event occurs, then  $S = S_C$ . Thus

$$\mathbb{E}[S \mid S_C] = \mathbb{P}(P_{i_C} \mid S_C) S_C \geq \left(1 - e^{-f(n) \frac{S_C - 1}{n}}\right) \frac{S_C^2}{C} \geq \frac{S_C^2}{C} - S_C \frac{2n}{f(n)C} \quad (17)$$

where we used the facts that for  $S_C \leq 1$  the middle expression in (17) vanishes, that  $e^{-x} < 1/x$  for  $x > 0$ , and that  $1/x < 2/(x+1)$  for all  $x \geq 2$ . Simple manipulations, followed by Jensen's inequality and an application of  $\mathbb{E}[S_C] \geq (1 - \varepsilon)C$ , give

$$\mathbb{E}[S] \geq (1 - \varepsilon)^2 C - (1 - \varepsilon) C \frac{2n}{f(n)C} \geq (1 - 2\varepsilon)C - 2 \frac{n}{f(n)} \quad (18)$$

We next generalize the bound to the case  $E_C \geq (1 - \varepsilon) \binom{C}{2}$ . To this end note that, since at most  $\varepsilon \binom{C}{2}$  edges are missing from any subset of  $C$ , then any subset of  $S_C$  nodes of  $C$  has average degree at least

$$\max \left\{ 0, S_C - 1 - \binom{C}{2} \frac{2\varepsilon}{S_C} \right\} \geq S_C - \frac{\varepsilon C(C-1)}{2S_C} - 1 \quad (19)$$

We can thus re-write (17) as

$$\mathbb{E}[S \mid S_C] \geq \frac{S_C}{C} \left(1 - e^{-f(n) \frac{S_C - 1}{n}}\right) \left(S_C - \frac{\varepsilon C(C-1)}{2S_C}\right) \quad (20)$$

Standard calculations show that this expression is bounded from below by  $\frac{S_C^2}{C} - S_C \frac{2n}{f(n)C} - \frac{\varepsilon C}{2}$ , which by calculations akin to the ones above leads to  $\mathbb{E}[S] \geq (1 - \frac{5}{2}\varepsilon)C - 2 \frac{n}{f(n)}$ .

Similarly, we can show that  $\mathbb{E}[S] \geq (\frac{f(n)}{n} - \frac{5}{2}\varepsilon)C$ . To this end note that when ACC pivots on  $\pi_{i_C}$  all the remaining cluster nodes are found with probability at least  $\frac{f(n)}{n}$  (this includes the cases  $S_C \leq 1$ , when such a probability is indeed 1). In (17), we can then replace  $1 - e^{-f(n) \frac{S_C - 1}{n}}$  with  $\frac{f(n)}{n}$ , which leads to  $\mathbb{E}[S] \geq (\frac{f(n)}{n} - \frac{5}{2}\varepsilon)C$ . This proves the first inequality in (9).

For the second inequality in (9), note that any subset of  $S_C$  nodes has  $\text{cut}(C, \overline{C}) \leq \varepsilon \binom{C}{2}$ . Thus,  $\pi_{i_C}$  is incident to at most  $\frac{\varepsilon}{S_C} \binom{C}{2}$  such edges in expectation. The expected number of nodes of  $\overline{C}$  that ACC assigns to  $\hat{C}$ , as a function of  $S_C$ , can thus be bounded by  $\frac{S_C}{C} \frac{\varepsilon}{S_C} \binom{C}{2} < \frac{\varepsilon}{2} C$ .

As far as the  $\mathcal{O}(C e^{-Cf(n)/n})$  part of the bound is concerned, simply note that the bounds obtained so far hold unless  $i_C > \lceil f(n-1) \rceil$ , in which case ACC stops before ever reaching the first node of  $C$ . If this happens,  $\hat{C} = \{\pi_{i_C}\}$  and  $|\hat{C} \oplus C| < |C|$ . The event  $i_C > \lceil f(n-1) \rceil$  is the event that no node of  $C$  is drawn when sampling  $\lceil f(n-1) \rceil$  nodes from  $V$  without replacement. We can therefore apply Chernoff-type bounds to the random variable  $X$  counting the number of draws of nodes of  $C$  and get  $\mathbb{P}(X < (1 - \beta)\mathbb{E}[X]) \leq \exp(-\beta^2 \mathbb{E}[X]/2)$  for all  $\beta > 0$ . In our case  $\mathbb{E}[X] = \lceil f(n-1) \rceil |C|/n$ , and we have to bound the probability that  $X$  equals 0 <  $(1 - \beta)\mathbb{E}[X]$ . Thus

$$\mathbb{P}(X = 0) \leq \exp\left(-\frac{\beta^2 \mathbb{E}[X]}{2}\right) = \exp\left(-\frac{\beta^2 \lceil f(n-1) \rceil |C|}{2n}\right)$$

Note however that  $\lceil f(n-1) \rceil \geq f(n)/2$  unless  $n = 1$  (in which case  $V$  is trivial). Then, choosing e.g.  $\beta > \sqrt{4/5}$  yields  $\mathbb{P}(X = 0) < \exp(-|C|f(n)/5n)$ . This case therefore adds at most  $|C| \exp(-|C|f(n)/5n)$  to  $\mathbb{E}[|\hat{C} \oplus C|]$ .

### 3.2 Proof of Theorem 5

Before moving to the actual proof, we need some ancillary results. The next lemma bounds the probability that ACC does not pivot on a node of  $C$  in the first  $k$  rounds.

**Lemma 2.** Fix a subset  $C \subseteq V$  and an integer  $k \geq 1$ , and let  $\pi_1, \dots, \pi_n$  be a random permutation of  $V$ . For any  $v \in C$  let  $X_v = \mathbb{I}\{v \in \{\pi_1, \dots, \pi_k\}\}$ , and let  $X_C = \sum_{v \in C} X_v$ . Then  $\mathbb{E}[X_C] = \frac{k|C|}{n}$ , and  $\mathbb{P}(X_C = 0) < e^{-\frac{k|C|}{3n}}$ .

*Proof.* Since  $\pi$  is a random permutation, then for each  $v \in C$  and each  $i = 1, \dots, k$  we have  $\mathbb{P}(\pi_i = v) = \frac{1}{n}$ . Therefore  $\mathbb{E}[X_v] = \frac{k}{n}$  and  $\mathbb{E}[X_C] = \frac{k|C|}{n}$ . Now, the process is exactly equivalent to sampling without replacement from a set of  $n$  items of which  $|C|$  are marked. Therefore, the  $X_v$ 's are non-positively correlated and we can apply standard concentration bounds for the sum of independent binary random variables. In particular, for any  $\eta \in (0, 1)$  we have:

$$\mathbb{P}(X_C = 0) \leq \mathbb{P}(X_C < (1 - \eta)\mathbb{E}[X_C]) < \exp\left(-\frac{\eta^2 \mathbb{E}[X_C]}{2}\right)$$

which drops below  $e^{-\frac{k|C|}{3n}}$  by replacing  $\mathbb{E}[X_C]$  and choosing  $\eta \geq \sqrt{2/3}$ .  $\square$

The next lemma is the crucial one.

**Lemma 3.** Let  $\varepsilon \leq \frac{1}{10}$ . Consider a strongly  $(1 - \varepsilon)$ -knit set  $C$  with  $|C| > \frac{10n}{f(n)}$ . Let  $u_C = \min\{v \in C\}$  be the id of  $C$ . Then, for any  $v \in C$ , in any single run of ACC we have  $\mathbb{P}(\text{id}(v) = u_C) \geq \frac{2}{3}$ .

*Proof.* We bound from above the probability that any of three “bad” events occurs. As in the proof of Theorem 4, we equivalently see ACC as going through a sequence of candidate pivots  $\pi_1, \dots, \pi_n$  that is a uniform random permutation of  $V$ . Let  $i_C = \min\{i : \pi_i \in C\}$  be the index of the first node of  $C$  in the random permutation of candidate pivots. The first event,  $B_1$ , is  $\{i_C > \lceil f(n-1) \rceil\}$ . Note that, if  $B_1$  does not occur, then ACC will pivot on  $\pi_{i_C}$ . The second event,  $B_2$ , is the event that  $\pi_{i_C} \in V_{\text{sing}}$  if ACC pivots on  $\pi_{i_C}$  (we measure the probability of  $B_2$  conditioned on  $\overline{B_1}$ ). The third event,  $B_3$ , is  $\{\pi_{i_C} \notin P\}$  where  $P = \mathcal{N}_{u_C} \cap \mathcal{N}_v$ . If none among  $B_1, B_2, B_3$  occurs, then ACC forms a cluster  $\hat{C}$  containing both  $u_C$  and  $v$ , and by the min-tagging rule sets  $\text{id}(v) = \min_{u \in \hat{C}} u = u_C$ . We shall then show that  $\mathbb{P}(B_1 \cup B_2 \cup B_3) \leq 1/3$ .

For  $B_1$ , we apply Lemma 2 by observing that  $i_C > \lceil f(n-1) \rceil$  corresponds to the event  $X_C = 0$  with  $k = \lceil f(n-1) \rceil$ . Thus

$$\mathbb{P}(i_C > \lceil f(n-1) \rceil) < e^{-\frac{\lceil f(n-1) \rceil |C|}{3n}} \leq e^{-\frac{f(n-1)}{3n} \frac{10n}{f(n)}} = e^{-\frac{f(n-1)}{f(n)} \frac{10}{3}} < e^{-3}$$

where we used the fact that  $n \geq |C| \geq 11$  and therefore  $f(n-1) \geq \frac{10}{11}f(n)$ .

For  $B_2$ , recall that by definition every  $v \in C$  has at least  $(1 - \varepsilon)c$  edges. By the same calculations as the ones above, if ACC pivots on  $\pi_{i_C}$ , then:

$$\mathbb{P}(\pi_{i_C} \in V_{\text{sing}}) \leq \exp\left(-\frac{f(n-1)}{n-1}(1 - \varepsilon)c\right) \leq \exp\left(-\frac{f(n-1)}{n-1}\left(1 - \frac{1}{10}\right)\frac{10n}{f(n)}\right) \leq e^{-9}$$

For  $B_3$ , note that the distribution of  $\pi_{i_C}$  is uniform over  $C$ . Now, let  $\mathcal{N}_{u_C}$  and  $\mathcal{N}_v$  be the neighbor sets of  $u_C$  and  $v$  in  $C$ , and let  $P = \mathcal{N}_{u_C} \cap \mathcal{N}_v$ . We call  $P$  the set of good pivots. Since  $C$  is strongly  $(1 - \varepsilon)$ -knit, both  $u_C$  and  $v$  have at least  $(1 - \varepsilon)c$  neighbors in  $C$ . But then  $|C \setminus P| \leq 2\varepsilon c$  and

$$\mathbb{P}(\pi_{i_C} \notin P) = \frac{|C \setminus P|}{|C|} \leq 2\varepsilon \leq 1/5$$

By a union bound, then,  $\mathbb{P}(B_1 \cup B_2 \cup B_3) \leq e^{-3} + e^{-9} + 1/5 < 1/3$ .  $\square$

We are now ready to conclude the proof. Suppose we execute ACC independently  $K = 48\lceil \ln(n/p) \rceil$  times with the min-tagging rule. For a fixed  $v \in G$  let  $X_v$  be the number of executions giving  $\text{id}(v) = u_C$ . On the one hand, by Lemma 3,  $\mathbb{E}[X_v] \geq \frac{2}{3}K$ . On the other hand,  $v$  will not be assigned to the cluster with id  $u_C$  by the majority voting rule only if  $X_v \leq \frac{1}{2}K \leq \mathbb{E}[X_v](1 - \delta)$  where  $\delta = \frac{1}{4}$ .

By standard concentration bounds, then,  $\mathbb{P}(X_v \leq \frac{1}{2}K) \leq \exp\left(-\frac{\delta^2 \mathbb{E}[X_v]}{2}\right) = \exp\left(-\frac{K}{48}\right)$ . By setting  $K = 48 \ln(n/p)$ , the probability that  $v$  is not assigned id  $u_C$  is thus at most  $p/n$ . A union bound over all nodes concludes the proof.

## 4 Supplementary Material for Section 6

### 4.1 Proof of Theorem 8

We prove that there exists a distribution over labelings  $\sigma$  with  $\text{OPT} = 0$  on which any deterministic algorithm has expected cost at least  $\frac{n\varepsilon^2}{8}$ . Yao's minimax principle then implies the claimed result.

Given  $V = \{1, \dots, n\}$ , we define  $\sigma$  by a random partition of the vertices in  $d \geq 2$  isolated cliques  $T_1, \dots, T_d$  such that  $\sigma(v, v') = +1$  if and only if  $v$  and  $v'$  belong to the same clique. The cliques are formed by assigning each node  $v \in V$  to a clique  $I_v$  drawn uniformly at random with replacement from  $\{1, \dots, d\}$ , so that  $T_i = \{v \in V : I_v = i\}$ . Consider a deterministic algorithm making queries  $\{s_t, r_t\} \in \mathcal{E}$ . Let  $E_i$  be the event that the algorithm never queries a pair of nodes in  $T_i$  with  $|T_i| \geq \frac{n}{2d} > 5$ . Apply Lemma 4 below with  $d = \frac{1}{\varepsilon}$ . This implies that the expected number of non-queried clusters of size at least  $\frac{n}{2d}$  is at least  $\frac{d}{2} = \frac{1}{2\varepsilon}$ . The overall expected cost of ignoring these clusters is therefore at least

$$\frac{d}{2} \left( \frac{n}{2d} \right)^2 = \frac{n^2}{8d} = \frac{\varepsilon n^2}{8}$$

and this concludes the proof.

**Lemma 4.** *Suppose  $d > 0$  is even,  $n \geq 16d \ln d$ , and  $B < \frac{d^2}{50}$ . Then for any deterministic learning algorithm making at most  $B$  queries,*

$$\sum_{i=1}^d \mathbb{P}(E_i) > \frac{d}{2}.$$

*Proof.* For each query  $\{s_t, r_t\}$  we define the set  $L_t$  of all cliques  $T_i$  such that  $s_t \notin T_i$  and some edge containing both  $s_t$  and a node of  $T_i$  was previously queried. The set  $R_t$  is defined similarly using  $r_t$ . Formally,

$$\begin{aligned} L_t &= \{i : (\exists \tau < t) s_\tau = s_t \wedge r_\tau \in T_i \wedge \sigma(s_\tau, r_\tau) = -1\} \\ R_t &= \{i : (\exists \tau < t) r_\tau = r_t \wedge s_\tau \in T_i \wedge \sigma(s_\tau, r_\tau) = -1\}. \end{aligned}$$

Let  $D_t$  be the event that the  $t$ -th query discovers a new clique of size at least  $\frac{n}{2d}$ , and let  $P_t = \max\{|L_t|, |R_t|\}$ . Using this notation,

$$\sum_{t=1}^B \mathbb{I}\{D_t\} = \sum_{t=1}^B \mathbb{I}\{D_t \wedge P_t < d/2\} + \underbrace{\sum_{t=1}^B \mathbb{I}\{D_t \wedge P_t \geq d/2\}}_N. \quad (21)$$

We will now show that unless  $B \geq \frac{d^2}{50}$ , we can upper bound  $N$  deterministically by  $\sqrt{2B}$ .

Suppose  $N > \frac{d}{2}$ , and let  $t_1, \dots, t_N$  be the times  $t_k$  such that  $\mathbb{I}\{D_{t_k} \wedge P_{t_k} \geq d/2\} = 1$ . Now fix some  $k$  and note that, because the clique to which  $s_{t_k}$  and  $r_{t_k}$  both belong is discovered, neither  $s_{t_k}$  nor  $r_{t_k}$  can occur in a future query  $\{s_t, r_t\}$  that discovers a new clique. Therefore, in order to have  $\mathbb{I}\{D_t \wedge P_t \geq d/2\} = 1$  for  $N > \frac{d}{2}$  times, at least

$$\binom{N}{2} \geq \frac{d^2}{8}$$

queries must be made, since each one of the other  $N - 1 \geq \frac{d}{2}$  discovered cliques can contribute with at most a query to making  $P_t \geq \frac{d}{2}$ . So, it takes at least  $B \geq \frac{d^2}{8}$  queries to discover the first  $\frac{d}{2}$  cliques of size at least two, which contradicts the lemma's assumption that  $B \leq \frac{d^2}{16}$ . Therefore,  $N \leq \frac{d}{2}$ .

Using the same logic as before, in order to have  $\mathbb{I}\{D_t \wedge P_t \geq d/2\} = 1$  for  $N \leq \frac{d}{2}$  times, at least

$$\frac{d}{2} + \left( \frac{d}{2} - 1 \right) + \dots + \left( \frac{d}{2} - N + 1 \right)$$

queries must be made. So, it must be

$$B \geq \sum_{k=1}^N \left( \frac{d}{2} - (k-1) \right) = (d+1) \frac{N}{2} - \frac{N^2}{2}$$

or, equivalently,  $N^2 - (d+1)N + 2B \geq 0$ . Solving this quadratic inequality for  $N$ , and using the hypothesis  $N \leq \frac{d}{2}$ , we have that  $N \leq \frac{(d+1) - \sqrt{(d+1)^2 - 8B}}{2}$ . Using the assumption that  $B \leq \frac{d^2}{50}$  we get that  $N \leq \sqrt{2B}$ .

We now bound the first term of (21) in expectation. The event  $D_t$  is equivalent to  $s_t, r_t \in T_i$  for some  $i \in \neg L_t \cap \neg R_t$ , where for any  $S \subseteq \{1, \dots, d\}$  we use  $\neg S$  to denote  $\{1, \dots, d\} \setminus S$ .

Let  $\mathbb{P}_t = \mathbb{P}(\cdot \mid P_t < d/2)$ . For  $L', R'$  ranging over all subsets of  $\{1, \dots, d\}$  of size strictly less than  $\frac{d}{2}$ ,

$$\begin{aligned} \mathbb{P}_t(D_t) &= \sum_{L', R'} \sum_{i \in \neg L' \cap \neg R'} \mathbb{P}_t(s_t \in T_i \wedge r_t \in T_i \mid L_t = L', R_t = R') \mathbb{P}_t(L_t = L' \wedge R_t = R') \\ &= \sum_{L', R'} \sum_{i \in \neg L' \cap \neg R'} \mathbb{P}_t(s_t \in T_i \mid L_t = L') \mathbb{P}_t(r_t \in T_i \mid R_t = R') \mathbb{P}_t(L_t = L' \wedge R_t = R') \end{aligned} \quad (22)$$

$$= \sum_{L', R'} \sum_{i \in \neg L' \cap \neg R'} \frac{1}{|\neg L'|} \frac{1}{|\neg R'|} \mathbb{P}_t(L_t = L' \wedge R_t = R') \quad (23)$$

$$\begin{aligned} &= \sum_{L', R'} \frac{|\neg L' \cap \neg R'|}{|\neg L'| |\neg R'|} \mathbb{P}_t(L_t = L' \wedge R_t = R') \\ &\leq \frac{2}{d}. \end{aligned} \quad (24)$$

Equality (22) holds because  $P_t = \max\{L_t, R_t\} < \frac{d}{2}$  implies that there are at least two remaining cliques to which  $s_t$  and  $r_t$  could belong, and each node is independently assigned to one of these cliques. Equality (23) holds because, by definition of  $L_t$ , the clique of  $s_t$  is not in  $L_t$ , and there were no previous queries involving  $s_t$  and a node belonging to a clique in  $\neg L_t$  (similarly for  $r_t$ ). Finally, (24) holds because  $|\neg L'| \geq \frac{d}{2}$ ,  $|\neg R'| \geq \frac{d}{2}$ , and  $|\neg L' \cap \neg R'| \leq \min\{|\neg L'|, |\neg R'|\}$ . Therefore,

$$\sum_{t=1}^B \mathbb{P}(D_t \wedge P_t < d/2) \leq \sum_{t=1}^B \mathbb{P}(D_t \mid P_t < d/2) \leq \frac{2B}{d}.$$

Putting everything together,

$$\mathbb{E} \left[ \sum_{t=1}^B \mathbb{I}\{D_t\} \right] \leq \frac{2B}{d} + \sqrt{2B}. \quad (25)$$

On the other hand, we have

$$\sum_{t=1}^B \mathbb{I}\{D_t\} = \sum_{i=1}^d \left( \mathbb{I}\{|T_i| \geq \frac{n}{2d}\} - \mathbb{I}\{E_i\} \right) = d - \sum_{i=1}^d \left( \mathbb{I}\{|T_i| < \frac{n}{2d}\} + \mathbb{I}\{E_i\} \right) \quad (26)$$

Combining (25) and (26), we get that

$$\sum_{i=1}^d \mathbb{P}(E_i) \geq d - \sum_{i=1}^d \mathbb{P}(|T_i| < \frac{n}{2d}) - \frac{2B}{d} - \sqrt{2B}.$$

By Chernoff-Hoeffding bound,  $\mathbb{P}(|T_i| < \frac{n}{2d}) \leq \frac{1}{d^2}$  for each  $i = 1, \dots, d$  when  $n \geq 16d \ln d$ . Therefore,

$$\sum_{i=1}^d \mathbb{P}(E_i) \geq d - \frac{2B+1}{d} - \sqrt{2B}.$$

To finish the proof, suppose on the contrary that  $\sum_{i=1}^d \mathbb{P}(E_i) \leq \frac{d}{2}$ . Then from the inequality above, we would get that

$$\frac{d}{2} \geq d - \frac{2B+1}{d} - \sqrt{2B}$$

which implies  $B \geq \left(\frac{2-\sqrt{2}}{4}\right)^2 d^2 > \frac{d^2}{50}$ , contradicting the assumptions. Therefore, we must have  $\sum_{i=1}^d \mathbb{P}(E_i) > \frac{d}{2}$  as required.  $\square$

#### 4.2 Proof of Theorem 9

Choose a suitably large  $n$  and let  $V = [n]$ . We partition  $V$  in two sets  $A$  and  $B$ , where  $|A| = \alpha n$  and  $|B| = (1 - \alpha)n$ ; we will eventually set  $\alpha = 0.9$ , but for now we leave it free to have a clearer proof. The set  $A$  is itself partitioned into  $k = 1/\varepsilon$  subsets  $A_1, \dots, A_k$ , each one of equal size  $\alpha n/k$  (the subsets are not empty because of the assumption on  $\varepsilon$ ). The labeling  $\sigma$  is the distribution defined as follows. For each  $i = 1, \dots, k$ , for each pair  $u, v \in A_i$ ,  $\sigma(u, v) = +1$ ; for each  $u, v \in B$ ,  $\sigma(u, v) = -1$ . Finally, for each  $v \in B$  we have a random variable  $i_v$  distributed uniformly over  $[k]$ . Then,  $\sigma(u, v) = +1$  for all  $u \in A_{i_v}$  and  $\sigma(u, v) = -1$  for all  $u \in A \setminus A_{i_v}$ . Note that the distribution of  $i_v$  is independent of the (joint) distributions of the  $i_w$ 's for all  $w \in B \setminus \{v\}$ .

Let us start by giving an upper bound on  $\mathbb{E}[\text{OPT}]$ . To this end consider the (possibly suboptimal) clustering  $\mathcal{C} = \{C_i : i \in [k]\}$  where  $C_i = A_i \cup \{v \in B : i_v = i\}$ . One can check that  $\mathcal{C}$  is a partition of  $V$ . The expected cost  $\mathbb{E}[\Delta_{\mathcal{C}}]$  of  $\mathcal{C}$  can be bound as follows. First, note the only mistakes are due to pairs  $u, v \in B$ . However, for any such fixed pair  $u, v$ , the probability of a mistake (taken over  $\sigma$ ) is  $\mathbb{P}(i_u \neq i_v) = 1/k$ . Thus,

$$\mathbb{E}[\text{OPT}] \leq \mathbb{E}[\Delta_0] < \frac{|B|^2}{k} = \frac{(1 - \alpha)^2 n^2}{k} \quad (27)$$

Let us now turn to the lower bound on the expected cost of the clustering produced by an algorithm. For each  $v \in B$  let  $Q_v$  be the total number of distinct queries the algorithm makes to pairs  $\{u, v\}$  with  $u \in A$  and  $v \in B$ . Let  $Q$  be the total number of queries made by the algorithm; obviously,  $Q \geq \sum_{v \in B} Q_v$ . Now let  $S_v$  be the indicator variable of the event that one of the queries involving  $v$  returned  $+1$ . Both  $Q_v$  and  $S_v$  as random variables are a function of the input distribution and of the choices of the algorithm. The following is key:

$$\mathbb{P}(S_v \wedge Q_v < k/2) < \frac{1}{2} \quad (28)$$

The validity of (28) is seen by considering the distribution of the input limited to the pairs  $\{u, v\}$ . Indeed,  $S_v \wedge Q_v < k/2$  implies the algorithm discovered the sole positive pair involving  $v$  in less than  $k/2$  queries. Since there are  $k$  pairs involving  $v$ , and for any fixed  $j$  the probability (taken over the input) that the algorithm finds that particular pair on the  $j$ -th query is exactly  $1/k$ . Now,

$$\mathbb{P}(S_v \wedge Q_v < k/2) + \mathbb{P}(\overline{S_v} \wedge Q_v < k/2) + \mathbb{P}(Q_v \geq k/2) = 1 \quad (29)$$

and therefore

$$\mathbb{P}(\overline{S_v} \wedge Q_v < k/2) + \mathbb{P}(Q_v \geq k/2) > \frac{1}{2} \quad (30)$$

Let us now consider  $R_v$ , the number of mistakes involving  $v$  made by the algorithm. We analyse  $\mathbb{E}[R_v | \overline{S_v} \wedge Q_v < k/2]$ . For all  $i \in [k]$  let  $Q_v^i$  indicate the event that, for some  $u \in A_i$ , the algorithm queried the pair  $\{u, v\}$ . Let  $I = \{i \in [k] : Q_v^i = 0\}$ ; thus  $I$  contains all  $i$  such that the algorithm did not query any pair  $u, v$  with  $u \in A_i$ . Suppose now the event  $\overline{S_v} \wedge Q_v < k/2$  occurs. On the one hand,  $\overline{S_v}$  implies that:

$$\mathbb{P}(\sigma(u, v) = +1 | I) = \begin{cases} 1/|I| & u \in A_i, i \in I \\ 0 & u \in A_i, i \in [k] \setminus I \end{cases} \quad (31)$$

Informally speaking, this means that the random variable  $i_v$  is distributed uniformly over the (random) set  $I$ . Now observe that, again conditioning on the joint event  $\overline{S_v} \wedge Q_v < k/2$ , whatever label  $s$  the algorithm assigns to a pair  $u, v$  with  $u \in A_i$  where  $i \in I$ , the distribution of  $\sigma(u, v)$  is independent

of  $s$ . This holds since  $s$  can obviously be a function only of  $I$  and of the queries made so far, all of which returned  $-1$ , and possibly of the algorithm's random bits. In particular, it follows that:

$$\mathbb{P}(\sigma(u, v) \neq s \mid I) \geq \min \{1/|I|, 1 - 1/|I|\} \quad (32)$$

However,  $Q_v < k/2$  implies that  $|I| \geq k - Q_v > k/2 = 2/\varepsilon > 2$ , which implies  $\min \{1/|I|, 1 - 1/|I|\} \geq 1/|I|$ . Therefore,  $\mathbb{P}(\sigma(u, v) \neq s \mid I) \geq 1/|I|$  for all  $u \in A_i$  with  $i \in I$ .

We can now turn to back to  $R_v$ , the number of total mistakes involving  $v$ . Clearly,  $R_v \geq \sum_{i=1}^k \sum_{u \in A_i} \mathbb{I} \{\sigma(u, v) \neq s\}$ . Then:

$$\mathbb{E}[R_v \mid E] = \mathbb{E} \left[ \sum_{i=1}^k \sum_{u \in A_i} \mathbb{I} \{\sigma(u, v) \neq s\} \mid \overline{S}_v \wedge Q_v < k/2 \right] \quad (33)$$

$$= \mathbb{E} \left[ \mathbb{E} \left[ \sum_{i=1}^k \sum_{u \in A_i} \mathbb{I} \{\sigma(u, v) \neq s\} \mid I \right] \mid \overline{S}_v \wedge Q_v < k/2 \right] \quad (34)$$

$$\geq \mathbb{E} \left[ \mathbb{E} \left[ \sum_{i \in I} \sum_{u \in A_i} \mathbb{I} \{\sigma(u, v) \neq s\} \mid I \right] \mid \overline{S}_v \wedge Q_v < k/2 \right] \quad (35)$$

$$\geq \mathbb{E} \left[ \mathbb{E} \left[ \sum_{i \in I} \sum_{u \in A_i} \frac{1}{|I|} \mid I \right] \mid \overline{S}_v \wedge Q_v < k/2 \right] \quad (36)$$

$$= \mathbb{E} \left[ \mathbb{E} \left[ \frac{\alpha n}{k} \mid \overline{S}_v \wedge Q_v < k/2 \right] \right] \quad (37)$$

$$= \frac{\alpha n}{k} \quad (38)$$

And therefore:

$$\begin{aligned} \mathbb{E}[R_v] &\geq \mathbb{E}[R_v \mid \overline{S}_v \wedge Q_v < k/2] \cdot \mathbb{P}(\overline{S}_v \wedge Q_v < k/2) \\ &> \frac{\alpha n}{k} \cdot \mathbb{P}(\overline{S}_v \wedge Q_v < k/2) \end{aligned}$$

This concludes the bound on  $\mathbb{E}[R_v]$ . Let us turn to  $\mathbb{E}[Q_v]$ . Just note that:

$$\mathbb{E}[Q_v] \geq \frac{k}{2} \cdot \mathbb{P}(Q_v \geq k/2) \quad (39)$$

By summing over all nodes, we obtain:

$$\mathbb{E}[Q] \geq \sum_{v \in B} \mathbb{E}[Q_v] \geq \frac{k}{2} \left( \sum_{v \in B} \mathbb{P}(Q_v \geq k/2) \right) \quad (40)$$

$$\mathbb{E}[\Delta] \geq \sum_{v \in B} \mathbb{E}[R_v] > \frac{\alpha n}{k} \left( \sum_{v \in B} \mathbb{P}(\overline{S}_v \wedge Q_v < k/2) \right) \quad (41)$$

to which, by virtue of (30), applies the constraint:

$$\left( \sum_{v \in B} \mathbb{P}(Q_v \geq k/2) \right) + \left( \sum_{v \in B} \mathbb{P}(\overline{S}_v \wedge Q_v < k/2) \right) > |B| \frac{1}{2} = \frac{(1-\alpha)n}{2} \quad (42)$$

This constrained system gives the bound. Indeed, by (40), (41) and (42), it follows that if  $\mathbb{E}[Q] < \frac{k}{2} \frac{(1-\alpha)n}{4} = \frac{(1-\alpha)nk}{8}$  then  $\mathbb{E}[\Delta] > \frac{\alpha n}{k} \frac{(1-\alpha)n}{2} = \frac{\alpha(1-\alpha)n^2}{4k}$ . It just remains to set  $\alpha$  and  $k$  properly so to get the statement of the theorem.

Let  $\alpha = 9/10$  and recall that  $k = 1/\varepsilon$ . Then, first,  $\frac{(1-\alpha)nk}{8} = \frac{nk}{80} = \frac{n}{80\varepsilon}$ . Second, (27) gives  $\mathbb{E}[\text{OPT}] < \frac{(1-\alpha)^2 n^2}{k} = \frac{n^2}{100k} = \frac{\varepsilon n^2}{100}$ . Third,  $\frac{\alpha(1-\alpha)n^2}{4k} = \frac{9n^2}{400k} = \frac{9\varepsilon n^2}{400} > \mathbb{E}[\text{OPT}] + \frac{\varepsilon n^2}{80}$ . The above statement hence becomes: if  $\mathbb{E}[Q] < \frac{n}{80\varepsilon}$ , then  $\mathbb{E}[\Delta] > \mathbb{E}[\text{OPT}] + \frac{\varepsilon n^2}{80}$ . An application of Yao's minimax principle completes the proof.

As a final note, we observe that for every  $c \geq 1$  the bound can be put in the form  $\mathbb{E}[\Delta] \geq c \cdot \mathbb{E}[\text{OPT}] + \Omega(n^2\varepsilon)$  by choosing  $\alpha \geq c/(c + 1/4)$ .

## 5 Supplementary Material for Section 7

We report the complete experimental evaluation of ACC including error bars (see the main paper for a full description of the experimental setting). The details of the datasets are found in Table 1.

Table 1: Description of the datasets.

| Datasets  | Type       | $ V $ | #Clusters |
|-----------|------------|-------|-----------|
| captchas  | Real       | 244   | 69        |
| cora      | Real-world | 1879  | 191       |
| gym       | Real       | 94    | 12        |
| landmarks | Real       | 266   | 12        |
| skew      | Synthetic  | 900   | 30        |
| sqrt      | Synthetic  | 900   | 30        |

## References

- [1] Nir Ailon, Moses Charikar, and Alantha Newman. Aggregating inconsistent information: Ranking and clustering. *J. ACM*, 55(5):23:1–23:27, 2008.
- [2] Devdatt Dubhashi and Alessandro Panconesi. *Concentration of Measure for the Analysis of Randomized Algorithms*. Cambridge University Press, New York, NY, USA, 1st edition, 2009.

Figure 1: Clustering cost vs. number of queries.

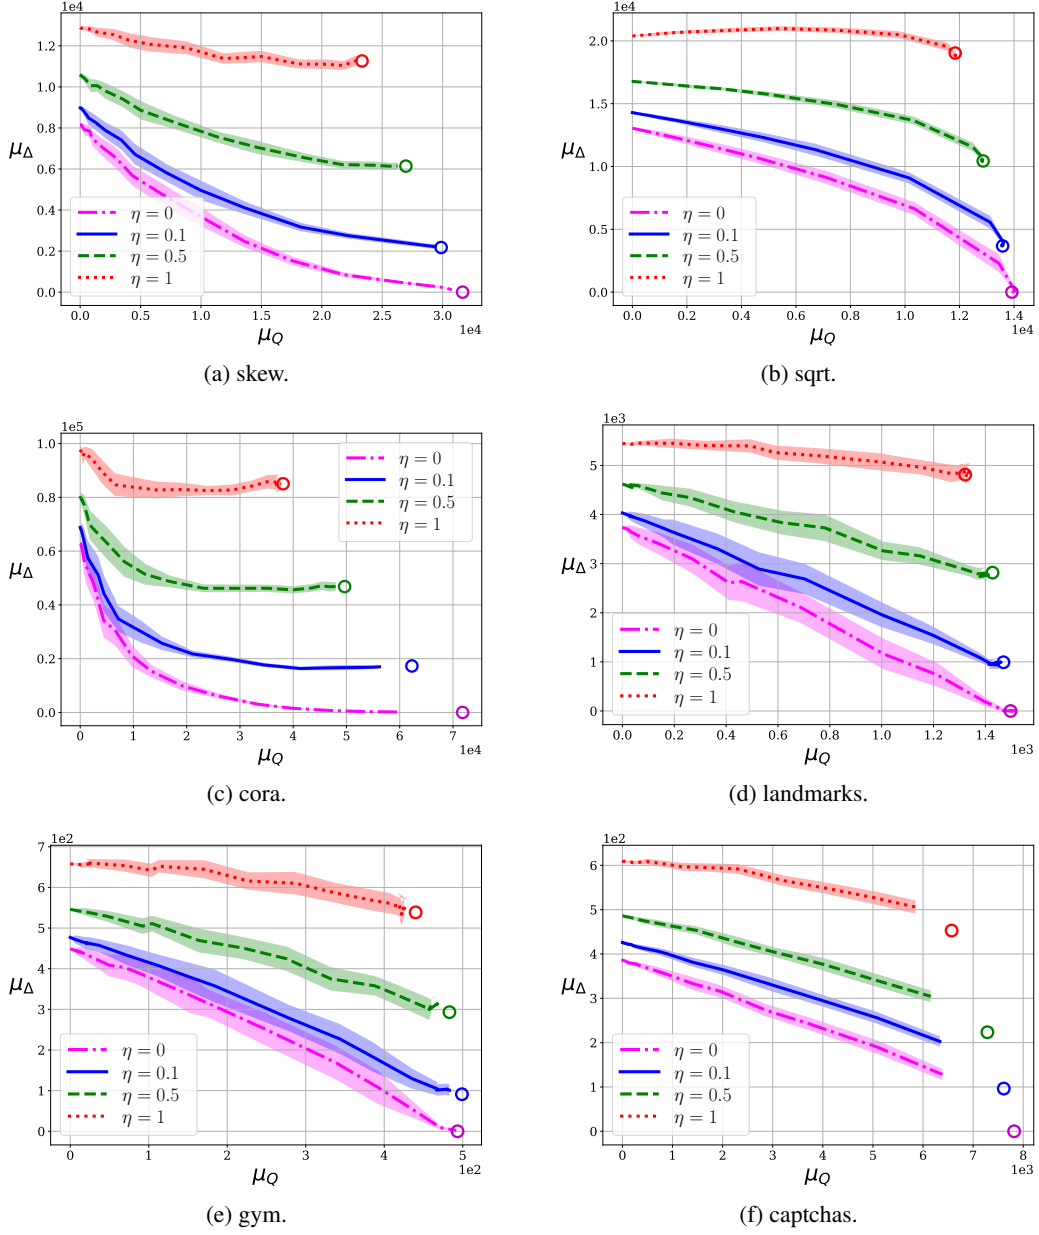

Supplement: Supplementary file [file b0ba5c44aaf65f6ca34cf116e6d82ebf-Supplemental.zip]
